# Supplementary material for: Knockdown of NEAT1 induces tolerogenic phenotype in dendritic cells by inhibiting activation of NLRP3 inflammasome
Source: PubMed Central journal article supplement — Theranostics. 2019 May 24;9(12):3425–42. doi: 10.7150/thno.33178 (PMC6587165; doi:10.7150/thno.33178), 2019-05-24
Supplement: thnov09p3425s2.pdf [file thnov09p3425s2.pdf]

## Supplementary Figure legends

Figure S1. The expression of NEAT1 was upregulated in LPS-induced DC maturation. **(A)** The expression of NEAT1 in DCs stimulated with the agonists lipoteichoic acid (TLR2), polyinosinic-polycytidylic acid (TLR3), and TLR7/8 (R848) for 24 h was detected by qRT-PCR. Data are expressed as mean  $\pm$  SD; n = 3 biological replicates; \*\*\*p<0.001, ns, not significant, derived using Student's t-test. **(B)** DCs were stimulated with LPS (10 ng/ml, 200 ng/ml, or 1  $\mu$ g/ml). NEAT1 v1 expression was determined by qRT-PCR at different time points (0, 4, 8, 12, and 24 h). **(C-D)** DCs were treated with Lipofectamine or LPS for 12 h, and the expression levels of co-stimulators (CD80, CD86, and MHC II) were detected by flow cytometry. Data are expressed as mean  $\pm$  SD; n = 3 biological replicates; \*\*\*p<0.001, derived using Student's t-test. **(E)** DCs were treated with Lipofectamine or LPS for 12 h, and the expression of NEAT1v2 was detected by qRT-PCR. Data are expressed as mean  $\pm$  SD; n = 3 biological replicates; \*\*\*p<0.001, derived using Student's t-test.

Figure S2. Knockdown of NEAT1 induces tolerogenic DCs. **(A)** qRT-PCR was used to detect the expression of NEAT1 after siRNA-mediated knockdown of NEAT1 in DCs. **(B)** The expression levels of co-stimulators (CD80, CD86, and MHC II) were detected by flow cytometry in DCs treated with NEAT1 siRNA (siNEAT1) or negative control (NC) for 12 h before treatment with LPS (200 ng/ml). Data are expressed as mean  $\pm$  SD; n = 4 biological replicates; \*\*\*p<0.001, derived using Student's t-test. **(C-D)** The levels of IL-1 $\beta$  and IL-6 were analyzed by ELISA in DC supernatants. Data are expressed as mean  $\pm$  SD; n = 3 biological replicates; \*\*\*p<0.001, \*\*\*\*p<0.0001 derived using Student's t-test.

Figure S3. NEAT1 regulates the expression of NLRP3 inflammasome by competing for miR-3076-3p. **(A)** The altered miRNA levels were selectively confirmed by qRT-PCR in the knockdown of NEAT1. Data are expressed as mean  $\pm$  SD; n = 3 biological replicates; \*\*p<0.01, \*\*\*p<0.001, derived using Student's t-test. **(B)** DCs were treated with miR-3076-3p inhibitor or miR-3076-3p mimic for 12 h, and the expression of NEAT1v2 was detected by qRT-PCR. Data are expressed as mean  $\pm$  SD; n = 3 biological replicates; \*\*\*p<0.001, derived using Student's t-test. **(C-G)** DCs were transfected with miR-3076-3p mimic, miR-3076 inhibitor, or NC. Relative mRNA expression of caspase-1 (C) and ASC (D) was detected by qRT-PCR. The protein levels of NLRP3 (E), caspase-1 (F), and ASC (G) were detected by western blotting. Data are expressed as mean  $\pm$  SD; n = 3 biological replicates; \*\*p<0.01, \*\*\*p<0.001, \*\*\*\*p<0.0001, derived using Student's t-test. **(H-L)** DCs transfected with siNEAT1, DCs overexpressing NEAT1 (OE NEAT1), DCs treated with siNEAT1+miR-3076-3p inhibitor or OE NEAT1+miR-3076-3p mimic, and negative control DCs. Relative mRNA expression of caspase-1 (H) and ASC (I) was detected by qRT-PCR. The protein levels of NLRP3 (J), caspase-1 (K), and ASC (L) were detected by western blotting. Data are expressed as mean  $\pm$  SD; n = 3 biological replicates; \*\*p<0.01, \*\*\*p<0.001, ns, not significant, derived using Student's t-test.

Figure S4. NEAT1 induces tol-DCs via miR-3076-3p/NLRP3 axis. **(A -B)** Western blotting was performed to detect the expression of NEAT1 after pcDNA-NLRP3 overexpression in DCs. Data are expressed as mean  $\pm$  SD; n = 3 biological replicates; \*\*p<0.01, derived using Student's t-test.

**(C-D)** DCs were treated with siNEAT1 or pcDNA-NLRP3, the control protein GAPDH was detected by western blot. Data are expressed as mean  $\pm$  SD; n = 3 biological replicates; ns not significant, derived using Student's t-test. **(E)** The expression levels of co-stimulators (CD80, CD86, and MHC II) were detected by flow cytometry in DCs treated with siNEAT1, siNEAT1+pcDNA-NLRP3, or siNEAT1+pcDNA-NLRP3 in the presence of a neutralizing monoclonal antibody specific for IL-1 $\beta$ .

Figure S5. NEAT1 is regulated by the transcription factor E2F1. **(A)** The expression of E2F1 mRNA was detected by qRT-PCR in DCs treated with E2F1 siRNA, DCs overexpressing E2F1, or NC. Data are expressed as mean  $\pm$  SD; n = 3 biological replicates; \*\*p<0.01, \*\*\*p<0.001, ns, not significant, derived using Student's t-test. **(B-C)** The levels of the E2F1 protein were assessed by western blotting in DCs treated with E2F1 siRNA, DCs overexpressing E2F1, or NC. Data are expressed as mean  $\pm$  SD; n = 3 biological replicates; \*\*\*p<0.001, ns, not significant, derived using Student's t-test. **(D)** CpG island distribution in the promoter of NEAT1. Horizontal axis denotes the genome sequence of NEAT1. Vertical blue stripes indicate CpG islands. **(E)** DCs were transfected with siE2F1 or NC for 12 h before undergoing stimulation with LPS. Methylation status of the CpG island was assessed by bisulfite sequencing in immature DCs (iDCs), LPS-DCs, NC, and siE2F1 DCs. Each row represents a single clone. **(F)** DCs were stimulated with an inhibitor of DNA methyltransferase (5-aza-2'-deoxycytidine) used at different concentrations (0.5  $\mu$ M, 0.05  $\mu$ M, 0.01  $\mu$ M, or 0.005  $\mu$ M) for 12 h before undergoing stimulation with LPS. The expression of NEAT1 was detected by qRT-PCR. Data are expressed as mean  $\pm$  SD; n = 3 biological replicates; \*\*\*p<0.001, ns, not significant, derived using Student's t-test.

Figure S6. Expression of the components of the NLRP3 inflammasome in EAM mice subjected to infusion with NEAT1-knockdown DCs. **(A)** Hearts harvested from the PBS-injected group and the group transfected with NC-DCs were stained with hematoxylin and eosin (the PBS group was shown in Figure 5H). Scale bars correspond to 100  $\mu$ m. **(B)** Assessment of hematoxylin and eosin staining by grading. Data are expressed as mean  $\pm$  SD; n = 5 biological replicates; ns, not significant, derived using Student's t-test. **(C-E)** Immunohistochemical labeling for NLRP3 (C), caspase-1 (D), and ASC (E) in hearts harvested from normal, PBS-treated, and siNEAT1-treated groups. Scale bars correspond to 50  $\mu$ m.

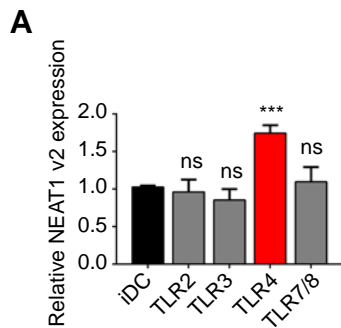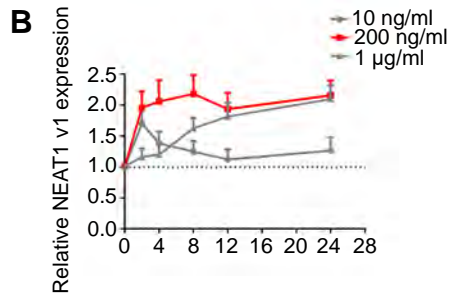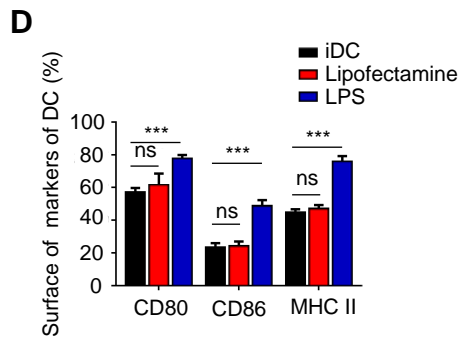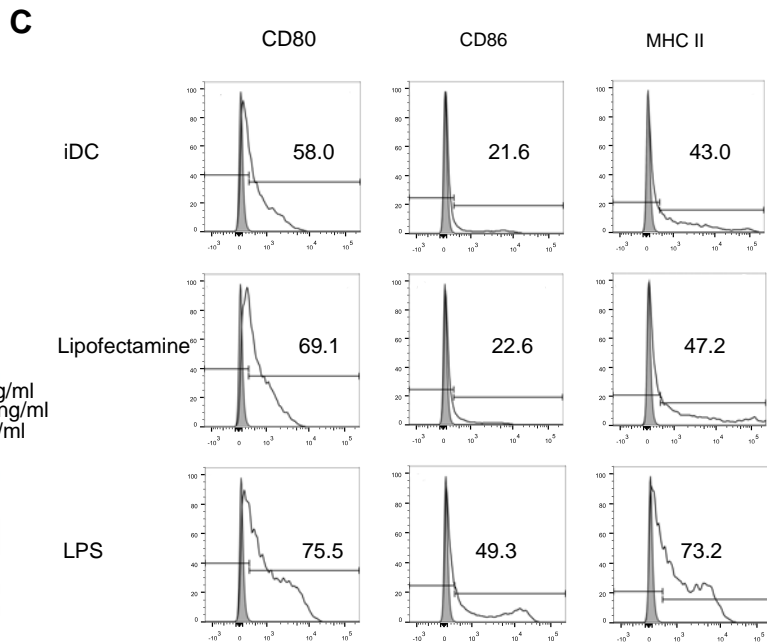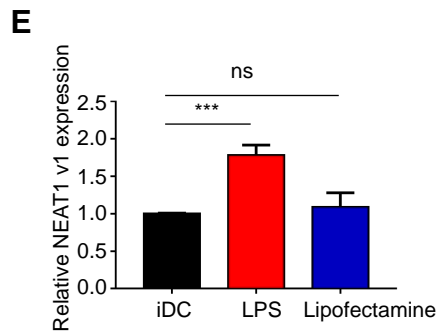

**A**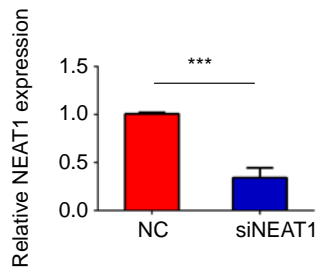**C**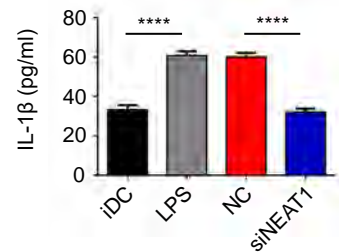**D**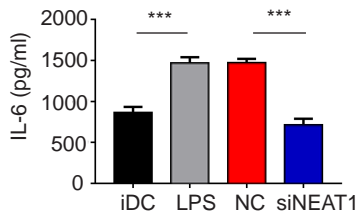**B**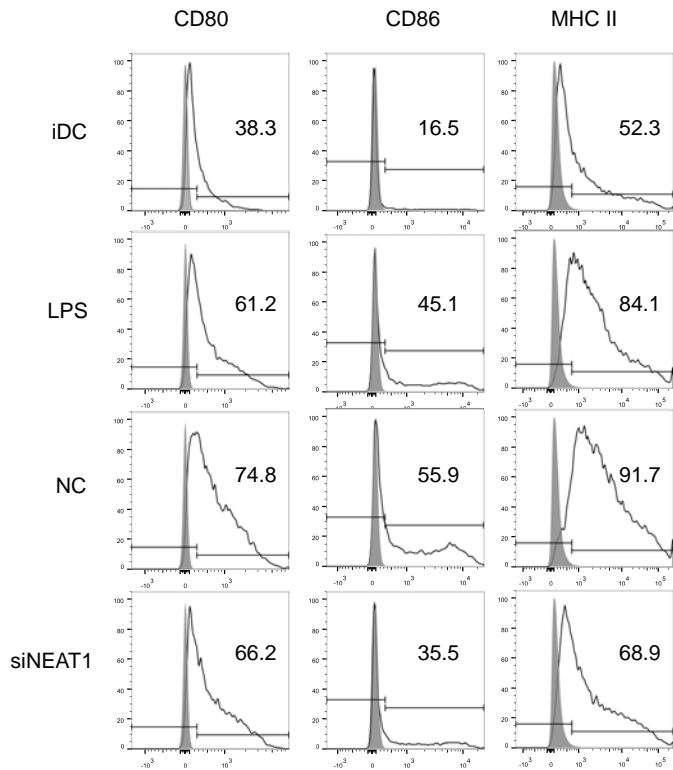

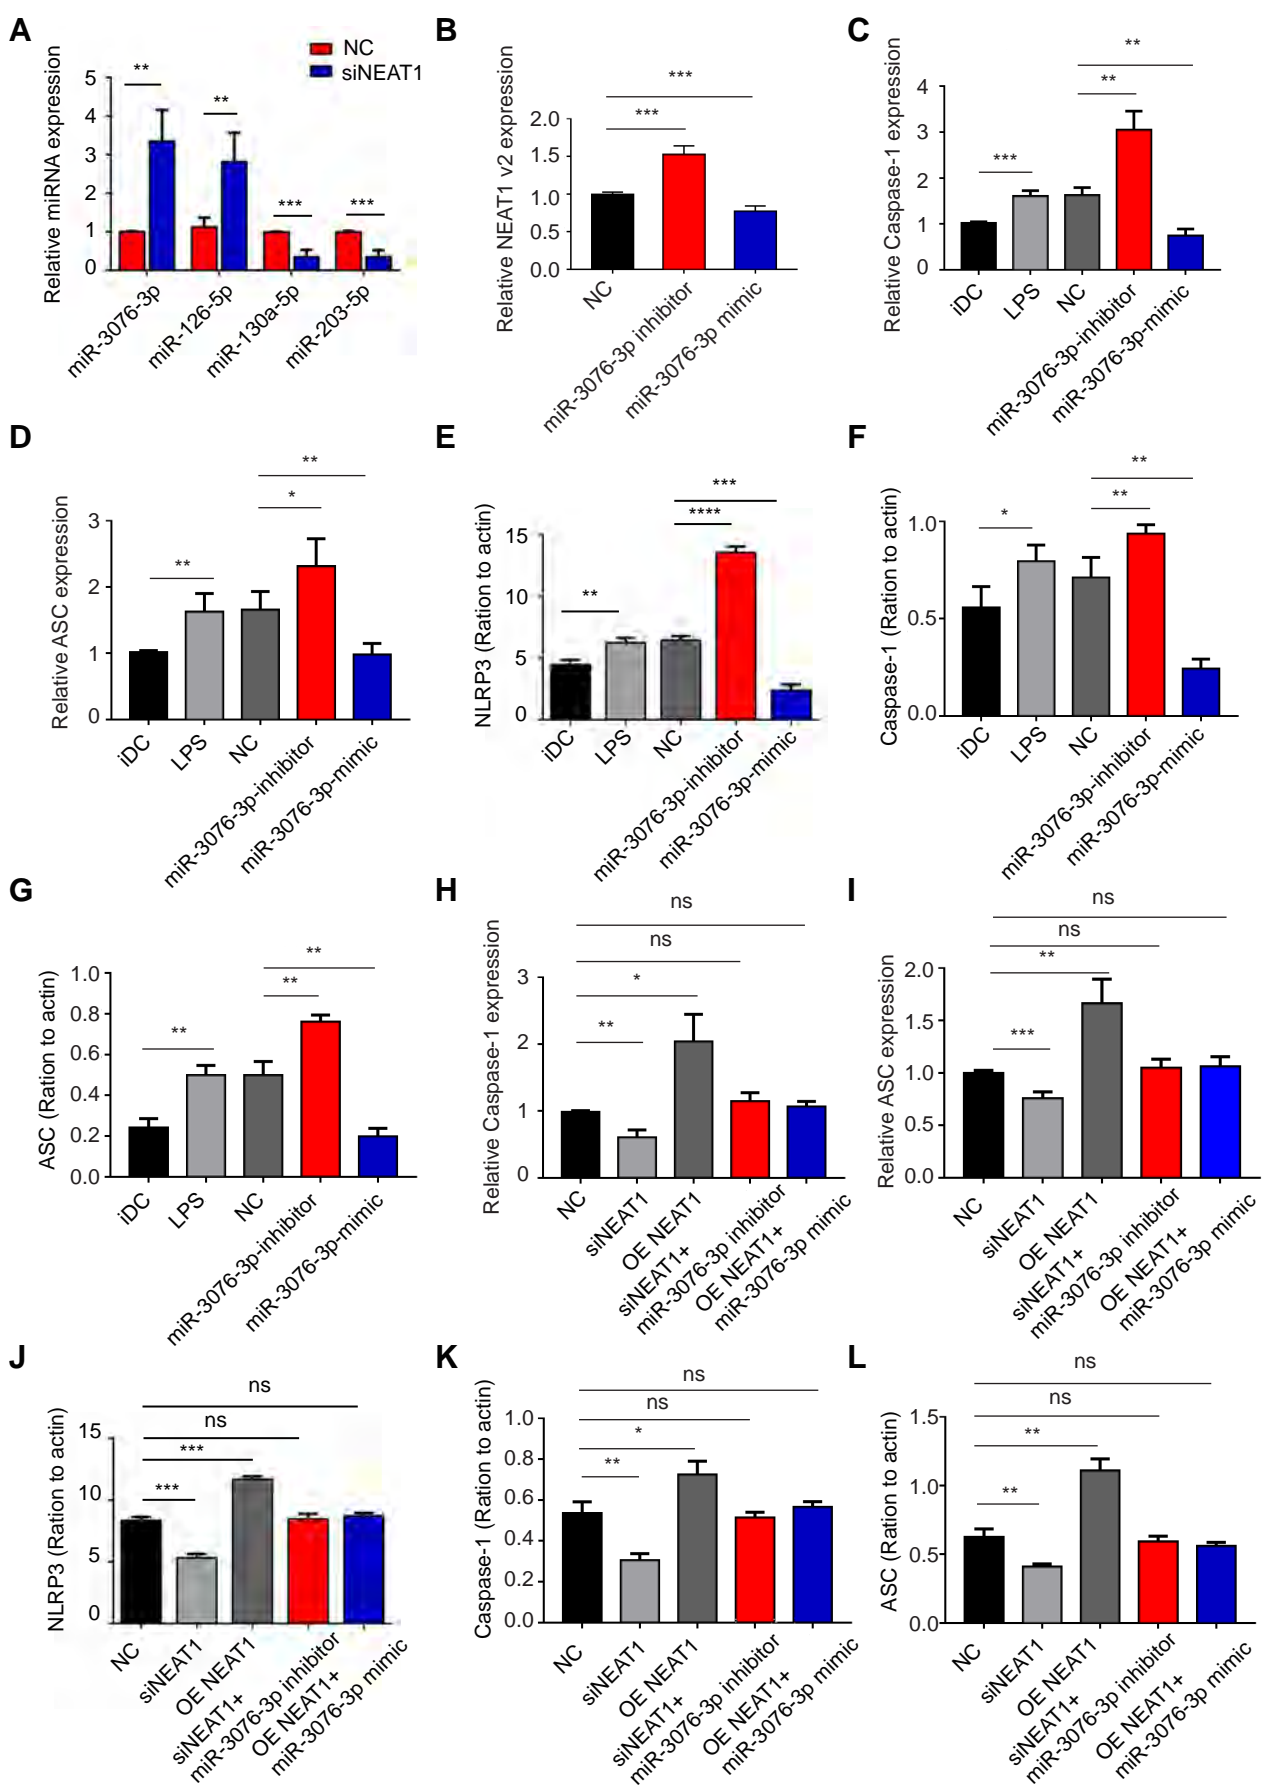

**A**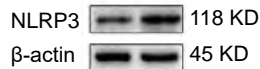**B**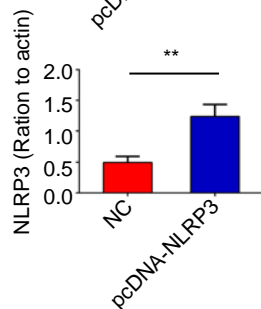**C**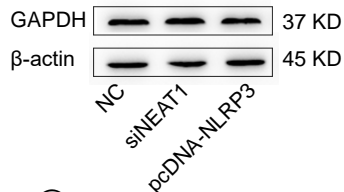**D**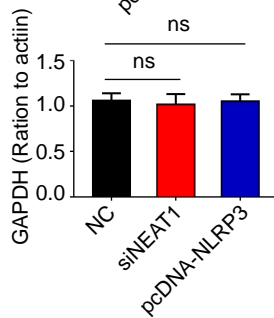**E**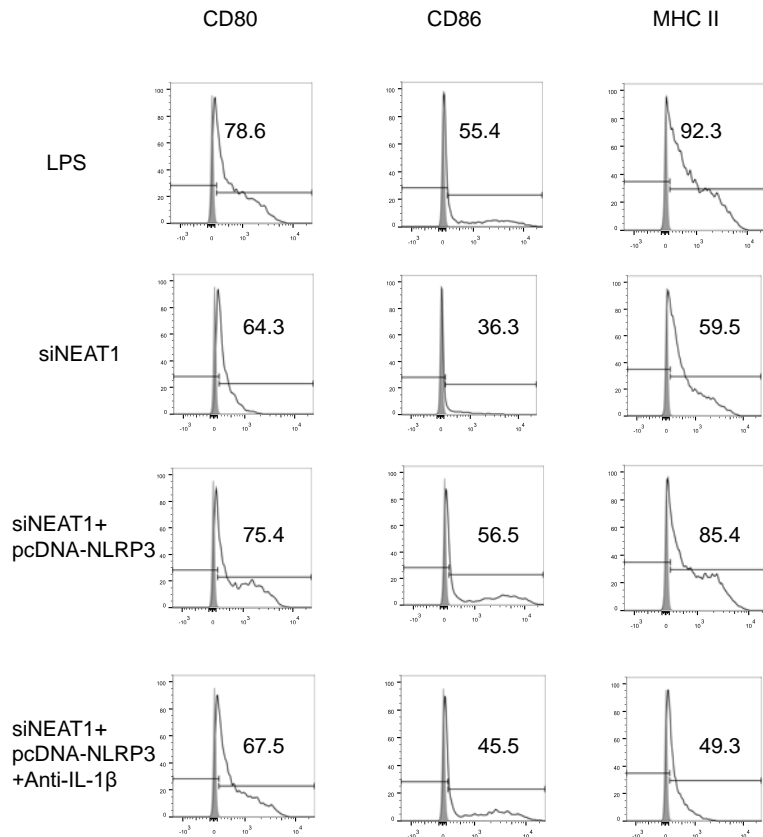

**A**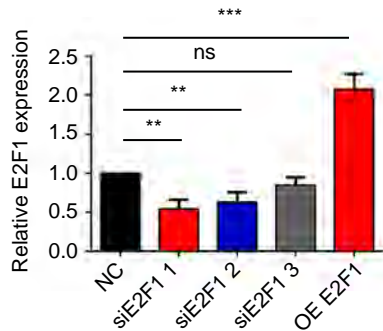**B**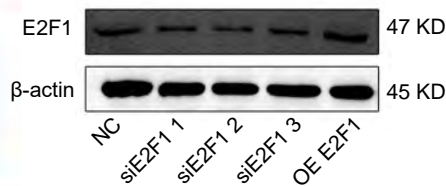**C**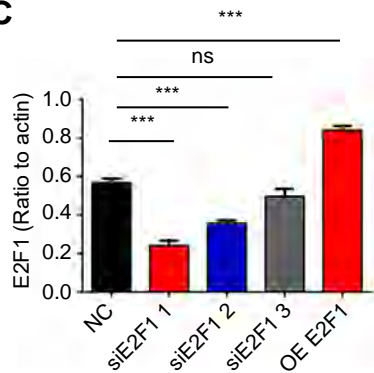**D**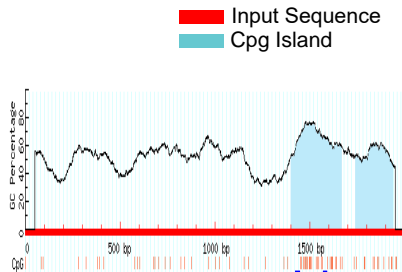**E**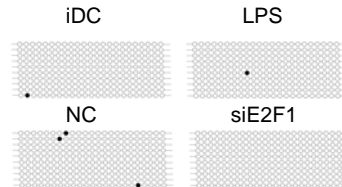**F**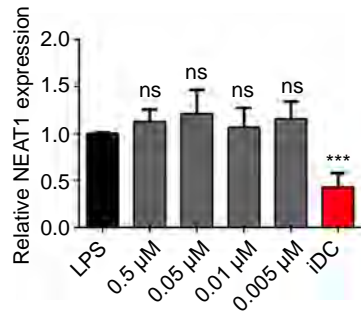

**A**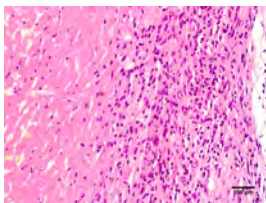

PBS

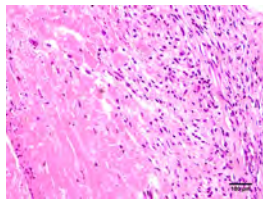

NC

**B**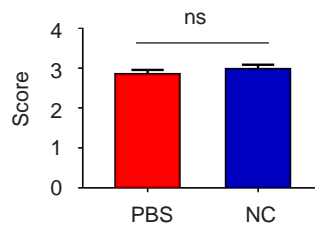**C**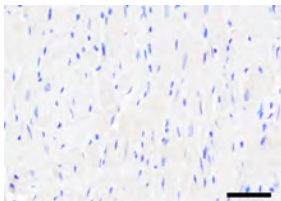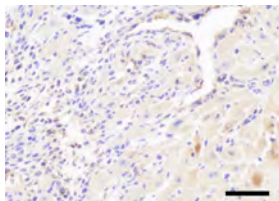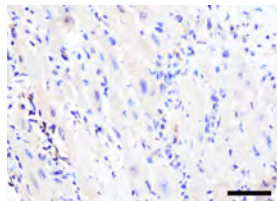

NLRP3

**D**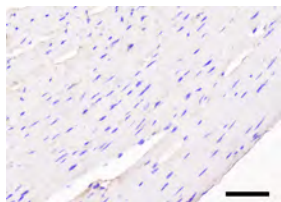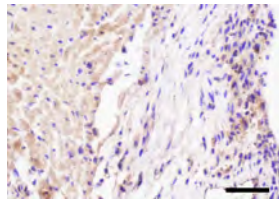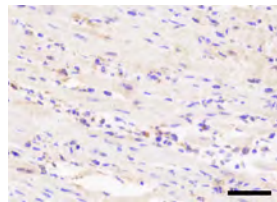

Caspase-1

**E**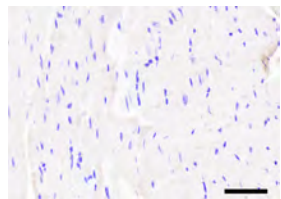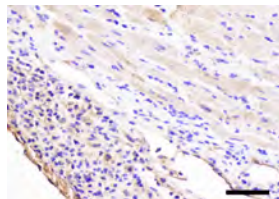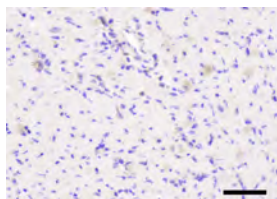

ASC

Normal

PBS

siNEAT1



**Table S2 Target sequence of NEAT1 Smart Silencer**

| Name                 | Target sequence of Smart Silencer                                                                                                         |
|----------------------|-------------------------------------------------------------------------------------------------------------------------------------------|
| NEAT1 Smart Silencer | GCGCAAGTTAGCCACAAAT<br>GAGGGATTCTTAACTGAAA<br>GGAGGAATCTTCCTTAGAT<br>TAACAGTGGGAAGGCGCAAG<br>AGTCGGTGCTGGAGTCTTGG<br>CCAGTGTGAGTCGTAGCAGT |

**Table S3 The list of PCR primer sequences and siRNA sequences**

| Primer name                 | Sequence 5'---3'           |
|-----------------------------|----------------------------|
| NEAT1_1 FO                  | TCCTCTACAGCCTTACCTACATC    |
| NEAT1_1 RE                  | AGACAACCTTCAACCAACAACC     |
| NEAT1_2 FO                  | CTTGTTCTGGGAGCATCAT        |
| NEAT1_2 RE                  | CTACACCTTACGCAATCTTCT      |
| U6 FO                       | ATTGGAACGATACAGAGAAGATT    |
| U6 RE                       | GGAACGCTTCACGAATTTG        |
| GAPDH FO                    | CCTTCATTGACCTCAACTACATGG   |
| GAPDH RE                    | CTCGCTCCTGGAAGATGGTG       |
| ACTB FO                     | CTTCTTTGCAGCTCCTTCGT       |
| ACTB RE                     | CTTCTGACCCATTCCCACC        |
| miR-3076-3p FO              | GGCAAACGCACTCTGGTCTTC      |
| miR-3076-3p RE              | TATGGTTGTTACGACTCCTTAC     |
| NLRP3 FO                    | AGATGCTGGAATTAGACAACCTG    |
| NLRP3 RE                    | CATTCACCCAACCTGTAGGC       |
| Caspase-1 FO                | ACCACTCGTACACGTCTTGC       |
| Caspase-2 RE                | TGGGCAGGCAGCAAATTCTT       |
| ASC FO                      | GAAGCTGCTGACAGTGCAAC       |
| ASC RE                      | TGTGAGCTCCAAGCCATACG       |
| E2F1 FO                     | TCACGCTATGAAACCTCACTAA     |
| E2F1 RE                     | TTCAAGCCGCTTACCAATC        |
| miR-126-5p FO               | CTGCTCACATTATTACTTTTGGT    |
| miR-126-5p RE               | TATGGTTGTTCTGCTCTCTGTCTC   |
| miR-130a-5p FO              | GCCTTCACATTGTGCTACTGTCTGC  |
| miR-130a-5p RE              | CCAGTCTCAGGGTCCGAGGTATTC   |
| miR-203-5p FO               | GTGAGTATGTGGAGTAGTTTTTGG   |
| miR-203-5p RE               | ACACCTTTTATACATCTAAATCACCC |
| miR-let-7i inhibitor        | AACAGCACAAACUACUACCUCA     |
| microRNA inhibitor NC       | CAGUACUUUUGUGUAGUACAA      |
| miR-let-7i mimic sense      | UGAGGUAGUAGUUUGUGUGUU      |
| miR-let-7i mimic antisense  | CAGCACAAACUACUACCUCAU      |
| microRNA mimic NC sense     | UUCUCCGAACGUGUCACGUTT      |
| microRNA mimic NC antisense | ACGUGACACGUUCGGAGAATT      |
| NEAT1 ChIP E2F1 FO          | CCACCCAAGCTGCTGGG          |
| NEAT1 ChIP E2F1 RE          | GGGATCTCTGCGGTGGC          |
| NEAT1 ChIP H3K27ac FO       | CTAAGGCCTCCTCACCTCTC       |
| NEAT1 ChIP H3K27ac RE       | GGTGCCTGGTACGCACAG         |
| NEAT1 RIP FO                | CTTGCCACACCTTGTCTTGC       |
| NEAT1 RIP RE                | TAGCTGGTGCATCCTGTGTG       |
| miR-3076-3p RIP FO          | GGCAAACGCACTCTGGTCTTC      |
| miR-3076-3p RIP RE          | TATGGTTGTTACGACTCCTTAC     |
| NEAT1 CpG1 FO               | TTATTTTGTGTTGTTYGTATTGA    |
| NEAT1 CpG1 RE               | TCACACCRAATATCAACRCTAAA    |

---

|                    |                           |
|--------------------|---------------------------|
| NEAT1 CpG2 FO      | TTATTTYGGTGGTGTTTATYGT    |
| NEAT1 CpG2 RE      | TCACCCAAACACTACTAAACRAAAC |
| siE2F1-1 sense     | GUGGAUUCUUCAGAGACAUTT     |
| siE2F1-1 antisense | AUGUCUCUGAAGAAUCCAATT     |
| siE2F1-2 sense     | CGCUAUGAAACCUCACUAATT     |
| siE2F1-2 antisense | UUAGUGAGGUUCAUAGCGTT      |
| siE2F1-3 sense     | GAGGGCAUUAGAGAUCUCUTT     |
| siE2F1-3 antisense | AGAGAUCUCUAAUGCCCUCTT     |

---
